# Supplementary material for: Software sustainability of global impact models
Source: Copernicus journal article supplement (doi:10.5194/gmd-17-8593-2024), 2024-12-05
Supplement: Supplementary file 1 [file gmd-17-8593-2024-supplement.zip]

**Supporting Information for**

## **Software sustainability of global impact models**

Emmanuel Nyenah<sup>1</sup>, Petra Döll<sup>1, 2</sup>, Daniel S. Katz<sup>3</sup>, and Robert Reinecke<sup>4</sup>

<sup>1</sup>Institute of Physical Geography, Goethe-University Frankfurt, 60438 Frankfurt am Main, Germany

<sup>2</sup>Senckenberg Biodiversity and Climate Research Centre (SBiK-F), 60438 Frankfurt am Main, Germany

<sup>3</sup>NCSA & CS & ECE & iSchool, University of Illinois Urbana-Champaign, Urbana, IL, 61801, USA

<sup>4</sup>Institute of Geography, Johannes Gutenberg-University Mainz, 55128 Mainz, Germany

*Correspondence to:* Emmanuel Nyenah (Nyenah@em.uni-frankfurt.de)

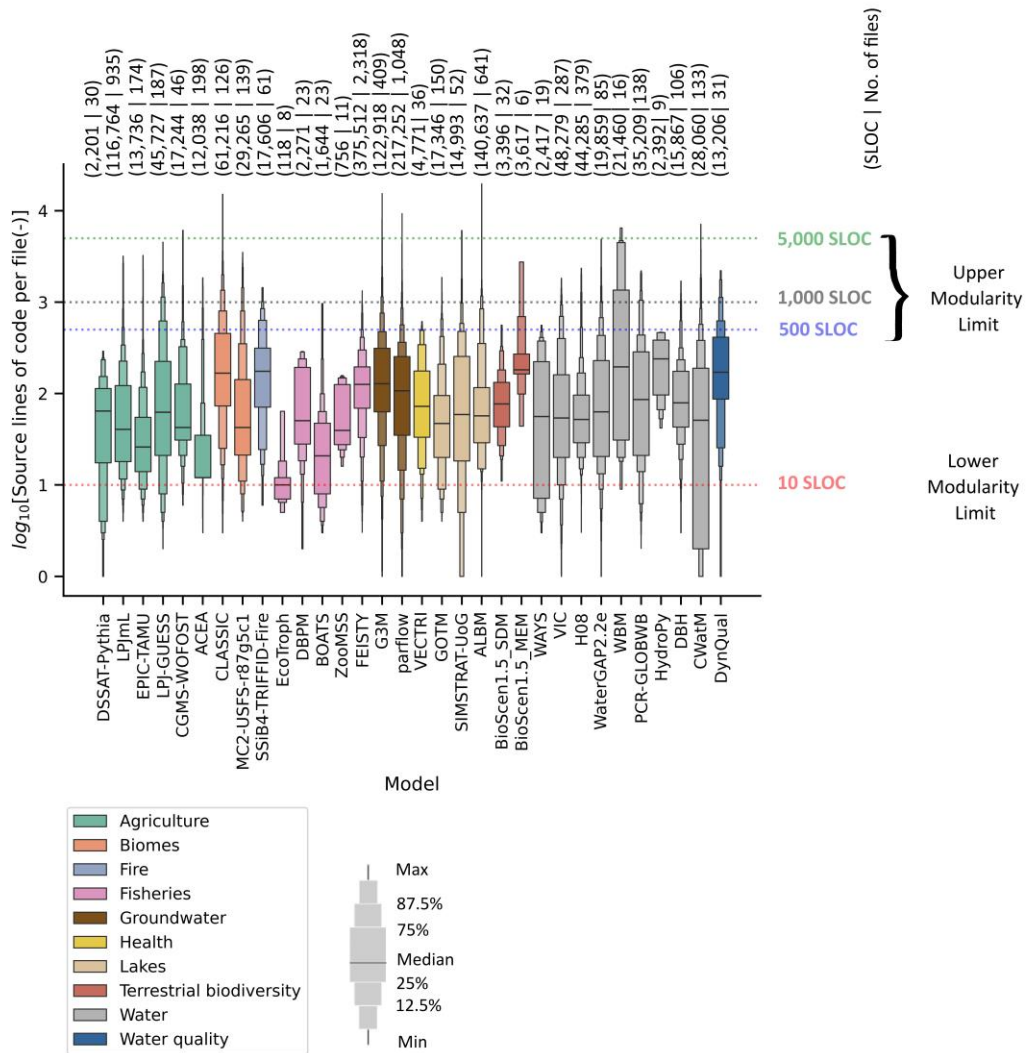

**Figure S1:** Letter value plot of source lines of code (SLOC) per file (logarithmic scale) of 32 global impact models across 10 sectors. The dotted blue, black, and green lines show upper modularity limits, the dotted red line the lower limit. The values (x|y) in the upper section of Fig. S1, show, for each GIM, SLOC | Number of files.

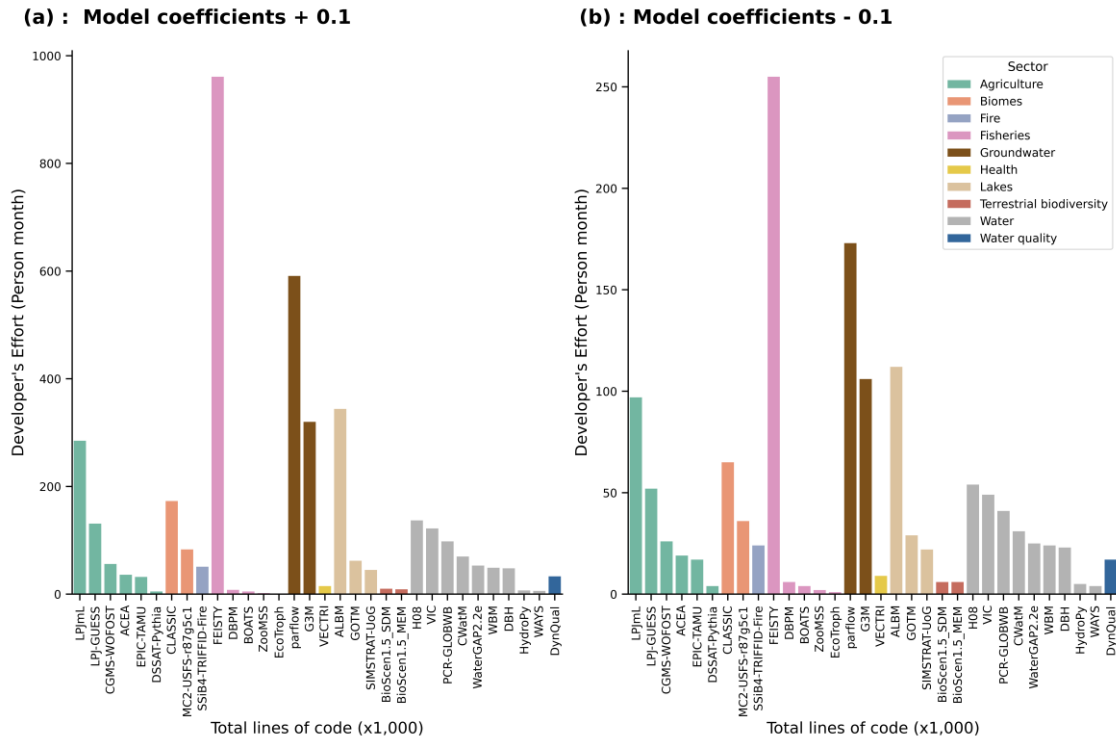

**Figure S2:** Impact of small change ( $\pm 0.1$ ) in COCOMO model coefficients.
