# Supplementary material for: Software sustainability of global impact models
Source: Copernicus journal article supplement (doi:10.5194/gmd-17-8593-2024), 2024-12-05
Supplement: Supplementary file 2 [file gmd-17-8593-2024-supplement.zip]

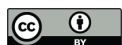

*Supplement of*

## **Software sustainability of global impact models**

**Emmanuel Nyenah et al.**

*Correspondence to:* Emmanuel Nyenah ([nyenah@em.uni-frankfurt.de](mailto:nyenah@em.uni-frankfurt.de))

- [gmd-17-8593-2024-supplement-title-page.pdf](#)
- [supplementary\\_files](#)
  - [ISIMIP\\_models.xlsx](#)
  - [supplementary\\_Nyenah\\_et\\_al\\_2024.pdf](#)

The copyright of individual parts of the supplement might differ from the article licence.
